# Supplementary material for: Widespread loss of Caribbean acroporid corals was underway before coral bleaching and disease outbreaks
Source: PubMed Central journal article supplement — Sci Adv. 2020 Apr 22;6(17):eaax9395. doi: 10.1126/sciadv.aax9395 (PMC7176417; doi:10.1126/sciadv.aax9395), 2020-04-22
Supplement: aax9395_SM.pdf [file aax9395_SM.pdf]

## Supplementary Materials for

### **Widespread loss of Caribbean acroporid corals was underway before coral bleaching and disease outbreaks**

Katie L. Cramer\*, Jeremy B. C. Jackson, Mary K. Donovan, Benjamin J. Greenstein,  
Chelsea A. Korpany, Geoffrey M. Cook, John M. Pandolfi

\*Corresponding author. Email: [katie.cramer@gmail.com](mailto:katie.cramer@gmail.com)

Published 22 April 2020, *Sci. Adv.* **6**, eaax9395 (2020)  
DOI: 10.1126/sciadv.aax9395

#### **The PDF file includes:**

Figs. S1 to S10  
Tables S2 to S10

#### **Other Supplementary Material for this manuscript includes the following:**

(available at [advances.sciencemag.org/cgi/content/full/6/17/eaax9395/DC1](https://advances.sciencemag.org/cgi/content/full/6/17/eaax9395/DC1))

Table S1.

Supplementary Materials

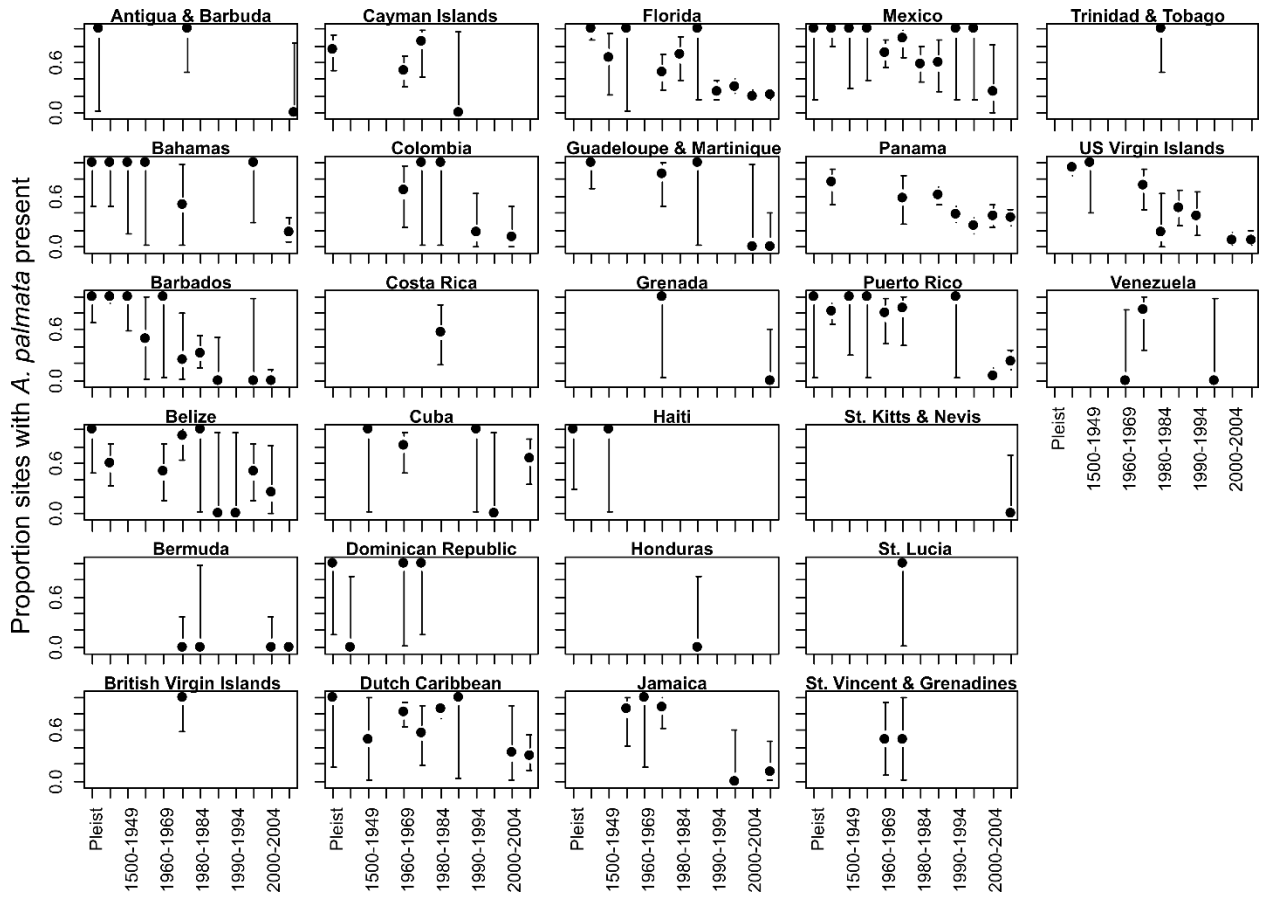

**Fig. S1. Proportion of reef sites with *A. palmata* present in reef crest zone, by country.** Bars are binomial confidence intervals.

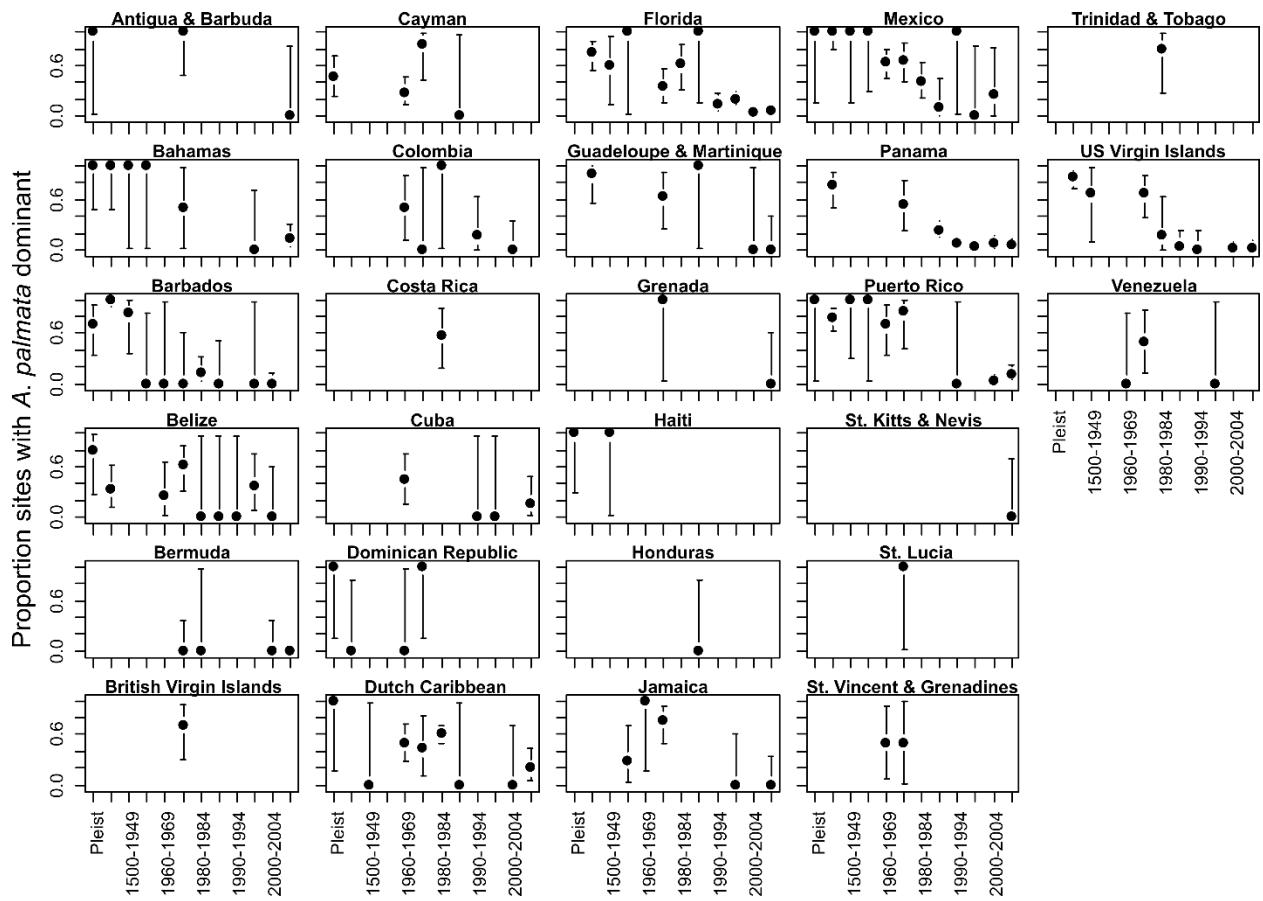

**Fig. S2. Proportion of reef sites with *A. palmata* dominant in reef crest zone, by country.** Bars are binomial confidence intervals.

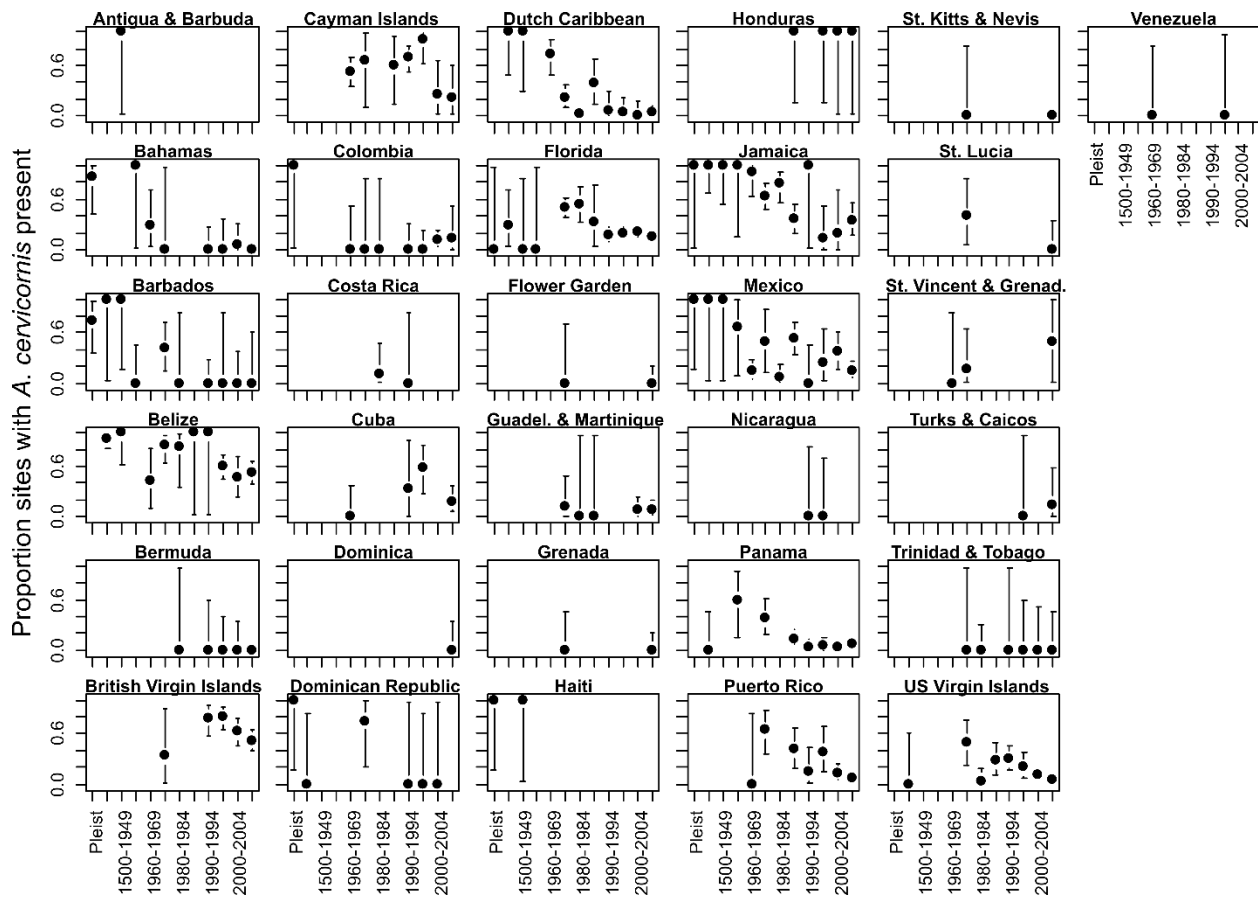

**Fig. S3. Proportion of reef sites with *A. cervicornis* present in midslope zone, by country.** Bars are binomial confidence intervals.

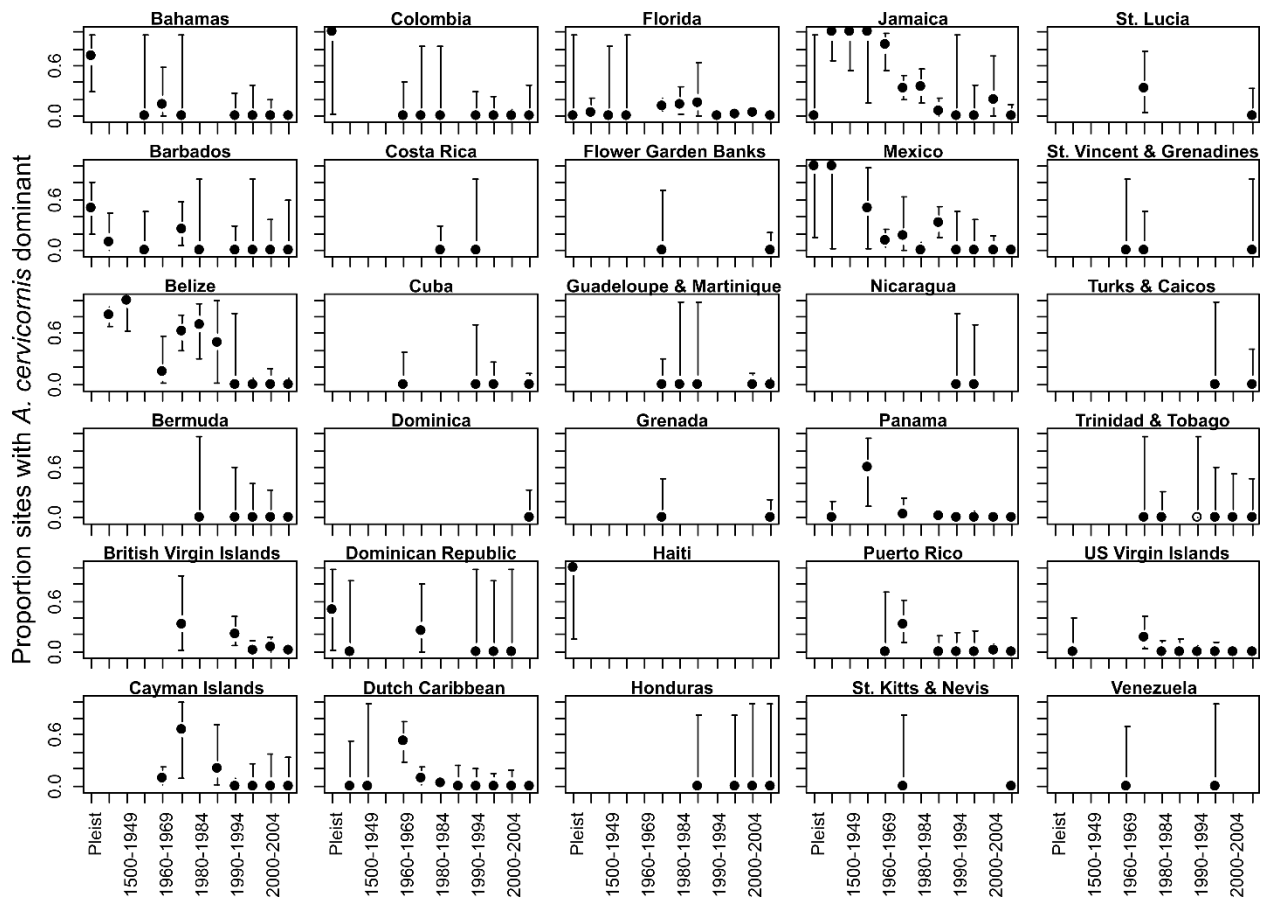

**Fig. S4. Proportion of reef sites with *A. cervicornis* dominant in mid-slope zone, by country.** Bars are binomial confidence intervals.

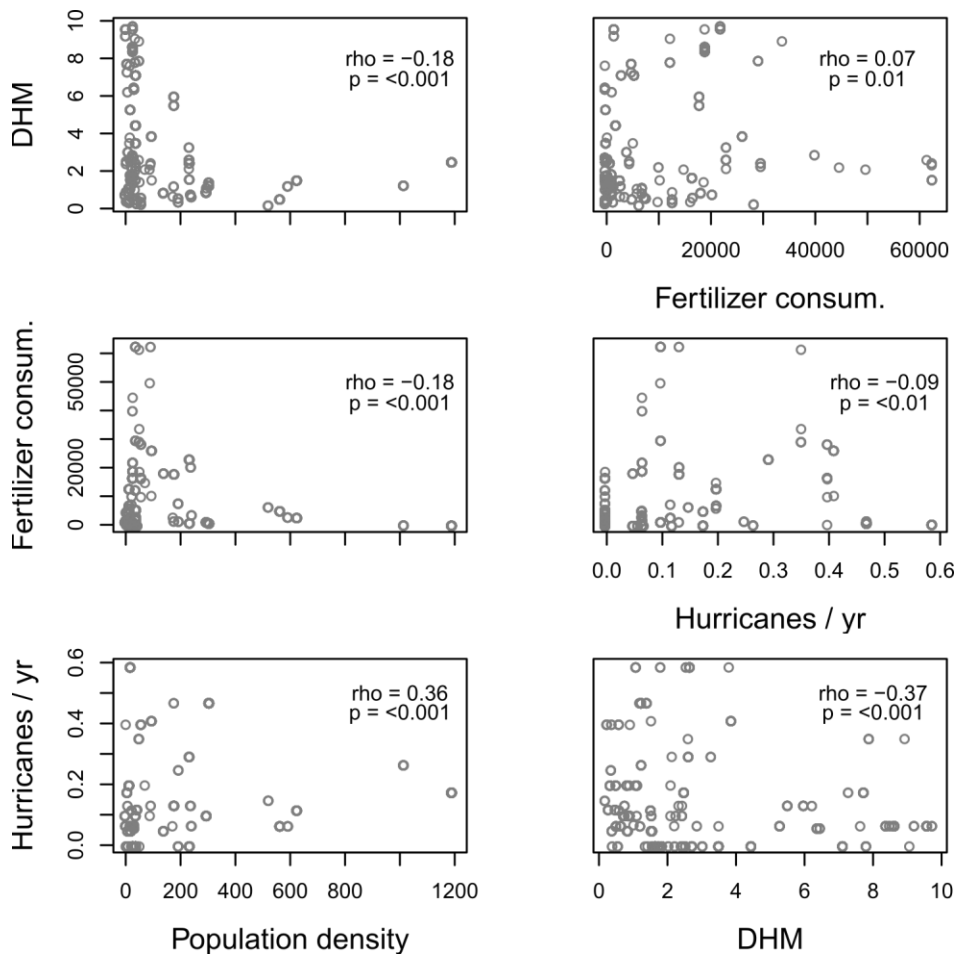

**Fig. S5. Relationship between potential drivers of decline in dominance of *A. palmata* at reef crest zone.** All comparisons are significant. Spearman rank sum test statistic ( $\rho$ ) and p-values indicated within each biplot.

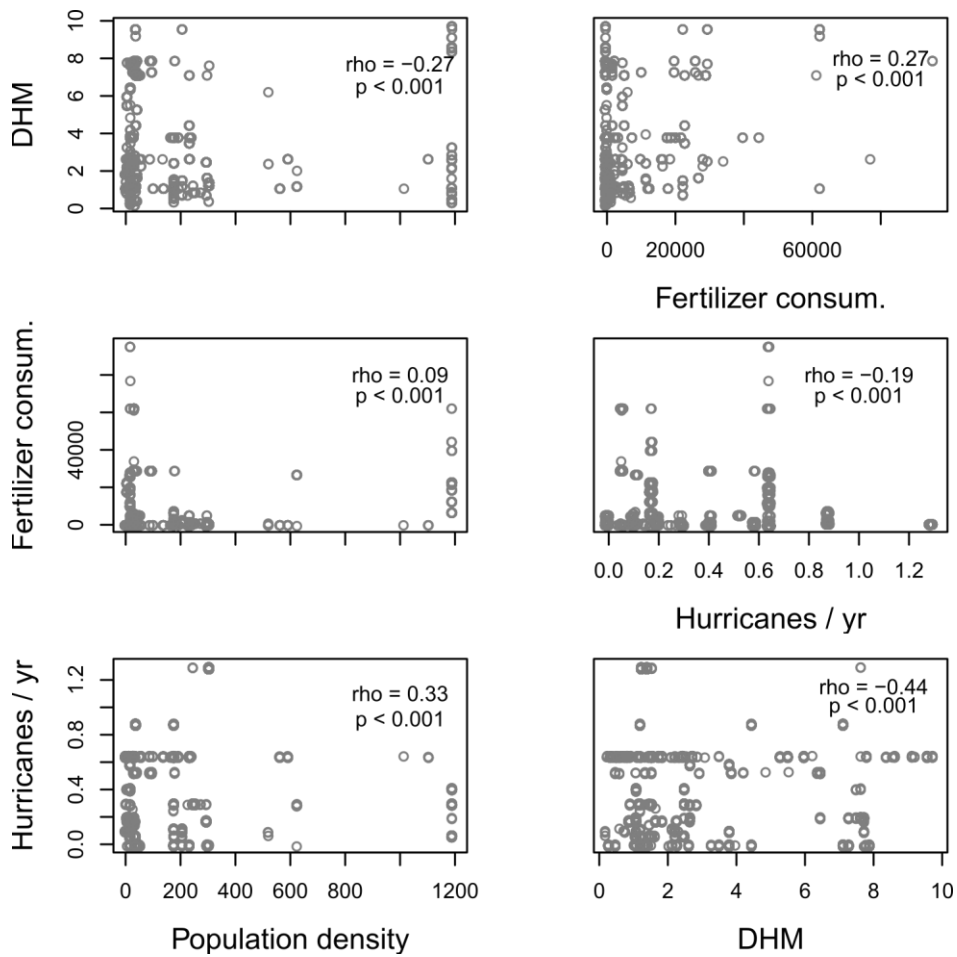

**Fig. S6. Relationship between potential drivers of decline in dominance of *A. cervicornis* at midslope reef zone.** All comparisons are significant. Spearman rank sum test statistic ( $\rho$ ) and p-values indicated within each biplot.

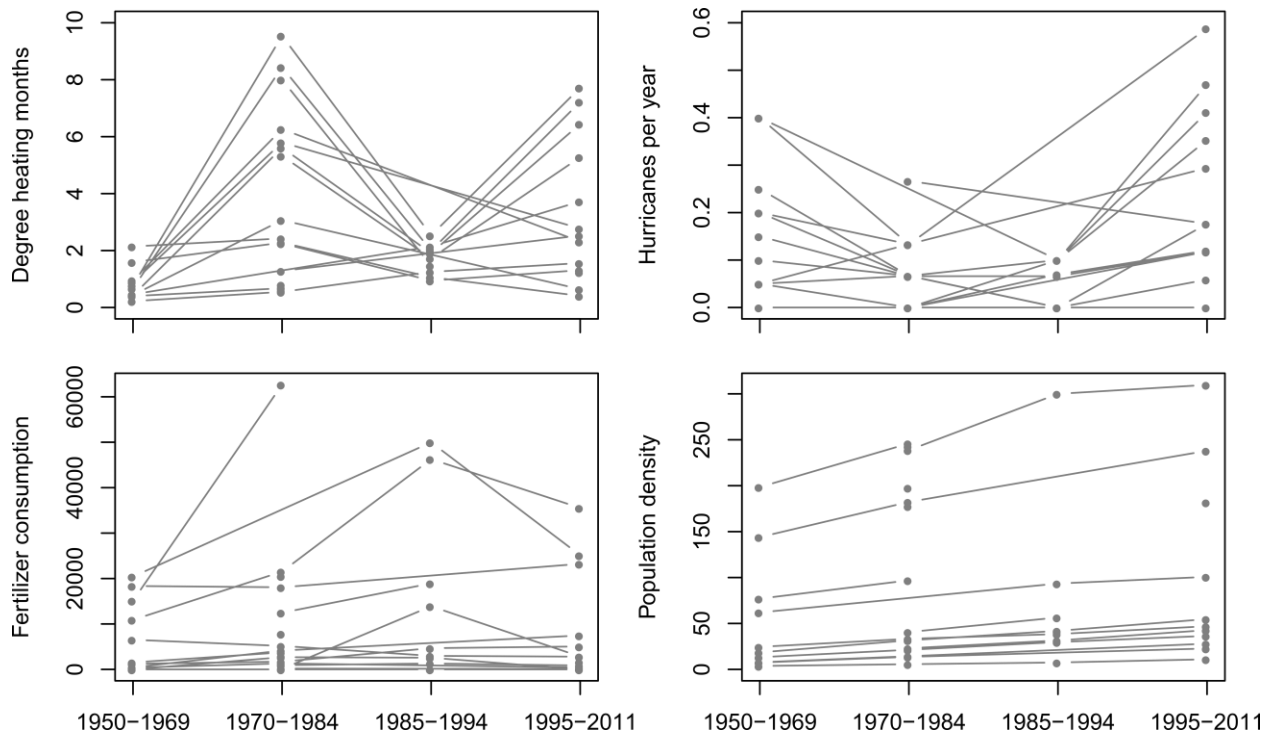

**Fig. S7. Trends in potential drivers of decline in dominance of *A. palmata* at reef crest zone.** Dots are mean values; trends plotted separately for each country.



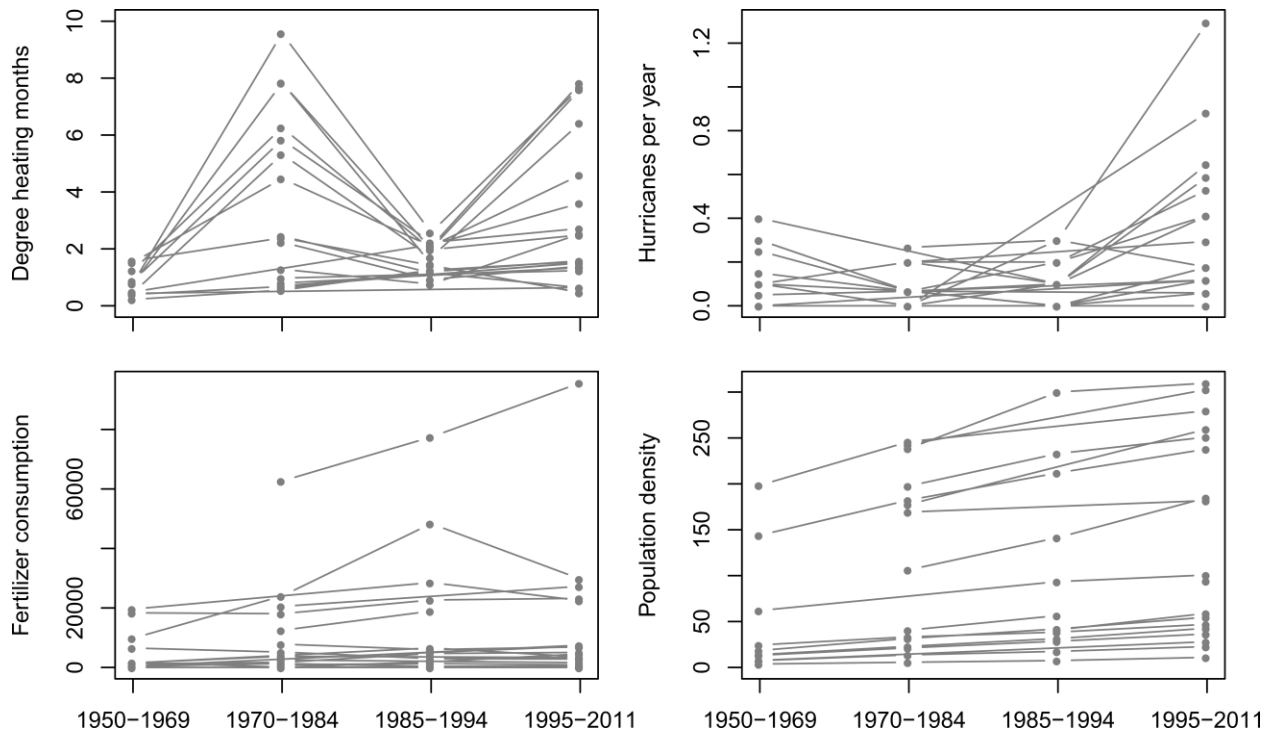

**Fig. S8. Temporal trends for potential drivers of decline in dominance of *A. cervicornis* at midslope reef zone.** Dots are mean values.

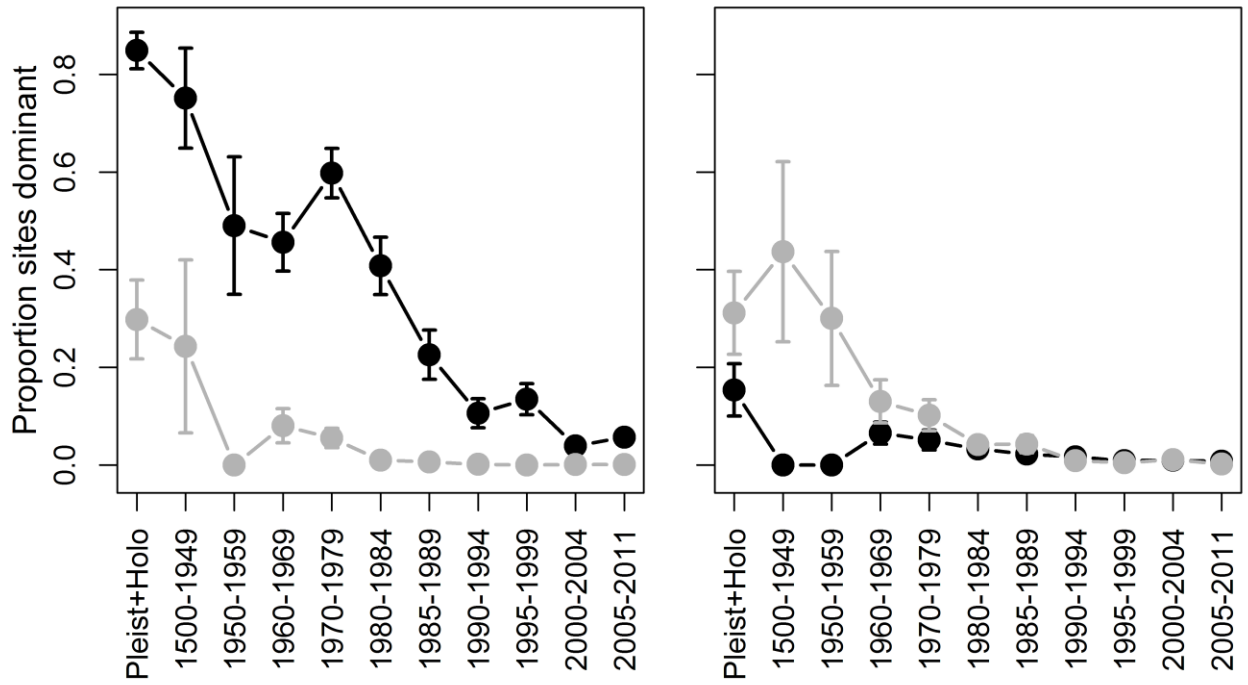

**Fig. S9. *Acropora* dominance through time, with Pleistocene and Holocene time periods combined.** GLMM results of *A. palmata* dominance (left) and *A. cervicornis* dominance (right) at reef crest (black line) and midslope zone (gray line). Error bars are standard error of the mean fitted values.

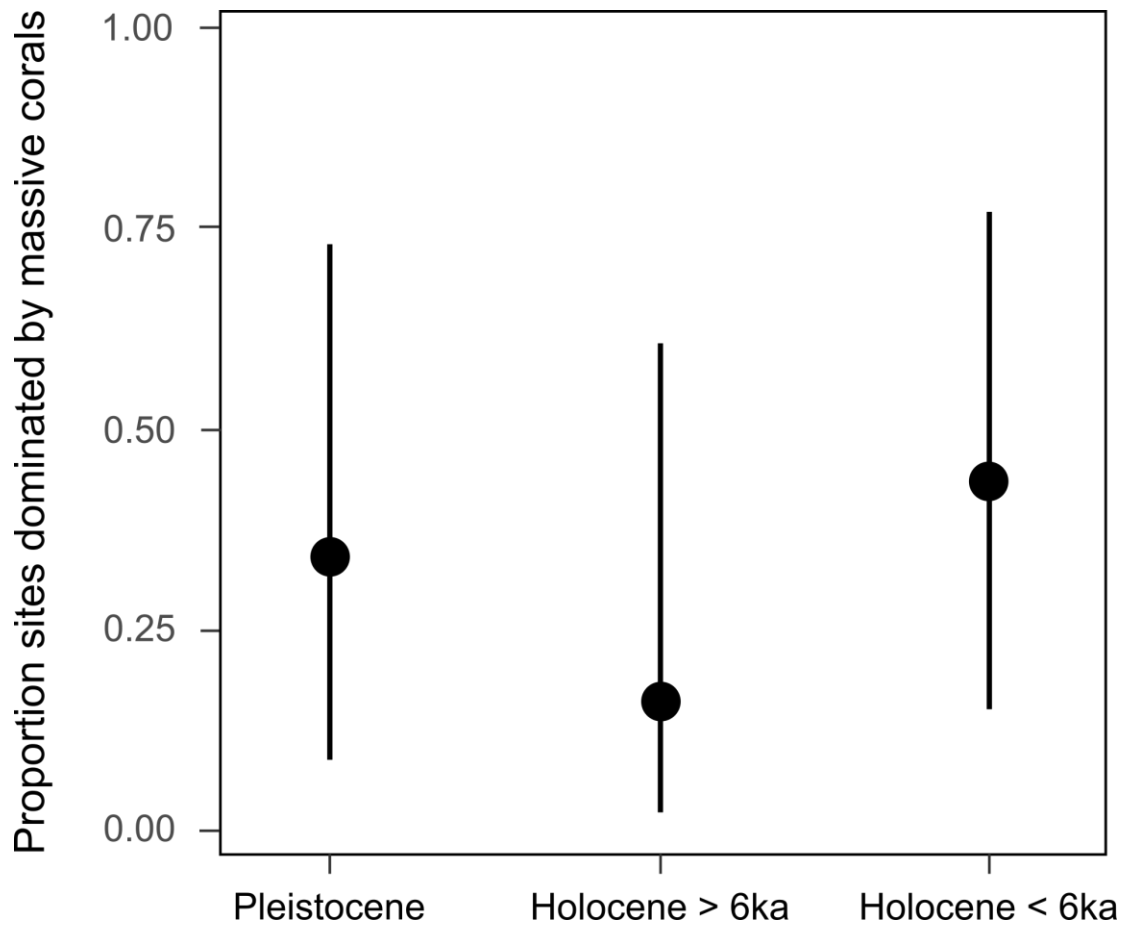

**Fig. S10. Dominance of slow-growing corals with a massive colony form during a period of fluctuating sea level (Pleistocene), sea level rise (Holocene > 6ka) and relative stasis in sea level (Holocene < 6ka).** Dots are mean fitted values determined from a binomial generalized linear mixed effects model that included time bin as fixed effect and country as random effect. Vertical bars are standard errors of mean fitted values.

**Table S2. Number of reef sites with dominance data for *A. palmata* at reef crest zone.** Countries with \* were not included in analyses of potential drivers of change because of insufficient data for one or more drivers.

| Country                     | Pleis<br>t | Holo       | 1500<br>- | 1950<br>- | 1960<br>-  | 1970<br>-  | 1980<br>-  | 1985<br>-  | 1990<br>-  | 1995<br>-  | 2000<br>-  | 2005-<br>2011 |
|-----------------------------|------------|------------|-----------|-----------|------------|------------|------------|------------|------------|------------|------------|---------------|
|                             |            |            | 1949      | 1959      | 1969       | 1979       | 1984       | 1989       | 1994       | 1999       | 2004       |               |
| Antigua & Barbuda *         | 1          |            |           |           |            | 5          |            |            |            |            |            | 2             |
| Bahamas                     | 5          | 5          | 1         | 1         |            | 2          |            |            |            | 3          |            | 30            |
| Barbados                    | 10         | 44         | 6         | 2         | 1          | 4          | 25         | 5          |            | 1          | 27         |               |
| Belize                      | 5          | 15         |           |           | 8          | 13         | 1          | 1          | 1          | 8          | 4          |               |
| Bermuda                     |            |            |           |           |            | 8          | 1          |            |            |            | 8          | 69            |
| British Virgin Islands *    |            |            |           |           |            | 7          |            |            |            |            |            |               |
| Cayman *                    | 17         |            |           |           | 32         | 7          |            | 1          |            |            |            |               |
| Colombia                    |            |            |           |           | 6          | 1          | 1          |            | 6          |            | 9          |               |
| Costa Rica                  |            |            |           |           |            |            | 7          |            |            |            |            |               |
| Cuba                        |            |            |           |           | 11         |            |            |            | 1          | 1          |            | 12            |
| Dominican Republic          | 2          | 2          |           |           | 1          | 2          |            |            |            |            |            |               |
| Dutch Caribbean             | 2          |            | 1         |           | 20         | 7          | 80         | 1          |            |            | 3          | 20            |
| Florida *                   |            | 28         | 5         | 1         |            | 23         | 13         | 2          | 54         | 110        | 185        | 276           |
| Guadel. & Martinique        |            | 10         |           |           |            | 8          |            | 1          |            |            | 1          | 7             |
| Grenada *                   |            |            |           |           |            | 1          |            |            |            |            |            | 4             |
| Haiti *                     | 3          |            | 1         |           |            |            |            |            |            |            |            |               |
| Honduras                    |            |            |           |           |            |            |            | 2          |            |            |            |               |
| Jamaica                     |            |            |           | 7         | 2          | 17         |            |            |            | 4          |            | 9             |
| Mexico                      | 2          | 17         | 2         | 3         | 33         | 18         | 22         | 10         | 1          | 2          | 4          |               |
| Panama                      |            | 17         |           |           |            | 11         |            | 93         | 101        | 96         | 56         | 89            |
| Puerto Rico *               | 1          | 38         | 3         | 1         | 10         | 7          |            |            | 1          |            | 48         | 57            |
| St. Kitts & Nevis           |            |            |           |           |            |            |            |            |            |            |            | 3             |
| St. Lucia                   |            |            |           |           |            | 1          |            |            |            |            |            |               |
| St. Vincent &<br>Grenadines |            |            |           |           | 4          | 2          |            |            |            |            |            |               |
| Trinidad & Tobago           |            |            |           |           |            |            | 5          |            |            |            |            |               |
| US Virgin Islands           |            | 51         | 3         |           |            | 15         | 6          | 22         | 14         |            | 58         | 51            |
| Venezuela                   |            |            |           |           | 2          | 6          |            |            |            | 1          |            |               |
| <b>Total</b>                | <b>47</b>  | <b>227</b> | <b>22</b> | <b>15</b> | <b>130</b> | <b>165</b> | <b>161</b> | <b>138</b> | <b>179</b> | <b>226</b> | <b>403</b> | <b>629</b>    |

**Table S3. Number of reef sites with dominance data for *A. cervicornis* at midslope zone.** Countries with \* were not included in analyses of potential drivers of change because of insufficient data on *A. cervicornis* dominance and/or insufficient data for one or more drivers.

| Country                  | Pleist    | Holo       | 1500-<br>1949 | 1950-<br>1959 | 1960-<br>1969 | 1970-<br>1979 | 1980-<br>1984 | 1985-<br>1989 | 1990-<br>1994 | 1995-<br>1999 | 2000-<br>2004 | 2005-<br>2011 |
|--------------------------|-----------|------------|---------------|---------------|---------------|---------------|---------------|---------------|---------------|---------------|---------------|---------------|
| Bahamas                  | 7         |            |               | 1             | 7             | 1             |               |               | 12            | 8             | 16            | 541           |
| Barbados                 | 10        | 10         |               | 6             |               | 12            | 2             |               | 11            | 2             | 8             | 4             |
| Belize                   |           | 51         | 8             |               | 7             | 24            | 7             | 2             | 2             | 55            | 19            | 53            |
| Bermuda                  |           |            |               |               |               |               | 1             |               | 4             | 7             | 9             | 105           |
| British Virgin Islands * |           |            |               |               |               | 3             |               |               | 24            | 40            | 40            | 64            |
| Cayman Islands *         |           |            |               |               | 37            | 3             |               | 5             | 40            | 12            | 8             | 9             |
| Colombia                 | 1         |            |               |               | 7             | 2             | 2             |               | 11            | 14            | 46            | 8             |
| Costa Rica               |           |            |               |               |               |               | 11            |               | 2             |               |               |               |
| Cuba                     |           |            |               |               | 8             |               |               |               | 3             | 12            |               | 28            |
| Dominica                 |           |            |               |               |               |               |               |               |               |               |               | 9             |
| Dominican Republic       | 2         | 2          |               |               |               | 4             |               |               | 1             | 2             | 1             |               |
| Dutch Caribbean          |           | 5          | 1             |               | 19            | 38            | 96            | 13            | 17            | 23            | 19            | 83            |
| Florida *                | 1         | 23         | 2             | 1             |               | 87            | 22            | 6             | 78            | 186           | 235           | 521           |
| Flower Garden *          |           |            |               |               |               | 3             |               |               |               |               |               | 16            |
| Guadel. & Martinique     |           |            |               |               |               | 10            | 1             | 1             |               |               | 27            | 48            |
| Grenada *                |           |            |               |               |               | 6             |               |               |               |               |               | 15            |
| Haiti *                  | 2         |            |               |               |               |               |               |               |               |               |               |               |
| Honduras                 |           |            |               |               |               |               |               | 2             |               | 2             | 1             | 1             |
| Jamaica                  | 1         | 9          | 6             | 2             | 13            | 48            | 23            | 31            | 1             | 8             | 5             | 26            |
| Mexico                   | 2         | 1          |               | 2             | 45            | 6             | 34            | 28            | 6             | 8             | 19            | 66            |
| Nicaragua *              |           |            |               |               |               |               |               |               | 2             | 3             |               |               |
| Panama                   |           | 16         |               | 5             |               | 22            |               | 72            | 53            | 44            | 119           | 132           |
| Puerto Rico *            |           |            |               |               | 3             | 15            |               | 17            | 14            | 13            | 56            | 181           |
| St. Kitts & Nevis        |           |            |               |               |               | 2             |               |               |               |               |               | 188           |
| St. Lucia                |           |            |               |               |               | 6             |               |               |               |               |               | 9             |
| St. Vincent & Grenadines |           |            |               |               | 2             | 6             |               |               |               |               |               | 2             |
| Turks & Caicos *         |           |            |               |               |               |               |               |               |               | 1             |               | 7             |
| Trinidad & Tobago        |           |            |               |               |               | 1             | 10            |               | 1             | 4             | 5             | 6             |
| US Virgin Islands        |           | 7          |               |               |               | 18            | 27            | 23            | 45            | 30            | 194           | 346           |
| Venezuela                |           |            |               |               | 3             |               |               |               |               | 1             |               |               |
| <b>Total</b>             | <b>26</b> | <b>124</b> | <b>17</b>     | <b>17</b>     | <b>151</b>    | <b>317</b>    | <b>236</b>    | <b>200</b>    | <b>327</b>    | <b>475</b>    | <b>827</b>    | <b>2468</b>   |

**Table S4. Structure of generalized linear mixed effect models used for time series analyses.** \* signifies random effect.

| Time period        | Reef zone | Coral species         | Response variable                    | Predictor variables   |
|--------------------|-----------|-----------------------|--------------------------------------|-----------------------|
| Pleistocene - 2011 | Crest     | <i>A. palmata</i>     | Proportion sites w/ species present  | ~ Time Bin + Country* |
|                    |           |                       | Proportion sites w/ species dominant | ~ Time Bin + Country* |
|                    |           | <i>A. cervicornis</i> | Proportion sites w/ species present  | ~ Time Bin + Country* |
|                    |           |                       | Proportion sites w/ species dominant | ~ Time Bin + Country* |
| Pleistocene - 2011 | Midslope  | <i>A. palmata</i>     | Proportion sites w/ species present  | ~ Time Bin + Country* |
|                    |           |                       | Proportion sites w/ species dominant | ~ Time Bin + Country* |
|                    |           | <i>A. cervicornis</i> | Proportion sites w/ species present  | ~ Time Bin + Country* |
|                    |           |                       | Proportion sites w/ species dominant | ~ Time Bin + Country* |

**Table S5. Structure of generalized linear mixed effect models used for drivers analyses.** Random effects indicated by \*. All four possible fixed effects included in initial model; non-significant fixed effects (in parentheses) dropped in final model. For *A. cervicornis* in the midslope zone, none of the fixed effects were significant.

| Time period | Reef zone | Coral species         | Response variable                    | Predictor variables                                                   |
|-------------|-----------|-----------------------|--------------------------------------|-----------------------------------------------------------------------|
| 1950-2011   | Crest     | <i>A. palmata</i>     | Proportion sites w/ species dominant | ~ Time Bin* + Country* + (DHM) + (FertCons) + (HurrPerYr) + PopDens   |
| 1950-2011   | Midslope  | <i>A. cervicornis</i> | Proportion sites w/ species dominant | ~ Time Bin* + Country* + (DHM) + (FertCons) + (HurrPerYr) + (PopDens) |

**Table S6. Model-fitted presence and dominance of *A. palmata* at reef crest zone, from Pleistocene Epoch to 2011.**

| Reef zone | Species           | Abundance measure | Time bin    | Percent sites | Effect | Z     | p-level |
|-----------|-------------------|-------------------|-------------|---------------|--------|-------|---------|
| Crest     | <i>A. palmata</i> | Presence          | Pleistocene | 94%           | --     | --    | --      |
|           |                   |                   | Holocene    | 92%           | -0.33  | -0.56 | 0.58    |
|           |                   |                   | 1500-1949   | 91%           | -0.51  | -0.62 | 0.54    |
|           |                   |                   | 1950-1959   | 86%           | -0.92  | -0.97 | 0.33    |
|           |                   |                   | 1960-1969   | 65%           | -2.17  | -3.82 | 0.00    |
|           |                   |                   | 1970-1979   | 74%           | -1.75  | -3.03 | 0.00    |
|           |                   |                   | 1980-1984   | 59%           | -2.40  | -4.11 | 0.00    |
|           |                   |                   | 1985-1989   | 50%           | -2.79  | -4.75 | 0.00    |
|           |                   |                   | 1990-1994   | 29%           | -3.69  | -6.29 | 0.00    |
|           |                   |                   | 1995-1999   | 24%           | -3.93  | -6.76 | 0.00    |
|           |                   |                   | 2000-2004   | 16%           | -4.43  | -7.71 | 0.00    |
|           |                   |                   | 2005-2011   | 19%           | -4.25  | -7.48 | 0.00    |
|           |                   | Dominance         | Pleistocene | 78%           | --     | --    | --      |
|           |                   |                   | Holocene    | 85%           | 0.44   | 1.10  | 0.27    |
|           |                   |                   | 1500-1949   | 78%           | -0.02  | -0.05 | 0.96    |
|           |                   |                   | 1950-1959   | 49%           | -1.3   | -1.99 | 0.05    |
|           |                   |                   | 1960-1969   | 45%           | -1.4   | -3.69 | 0.00    |
|           |                   |                   | 1970-1979   | 60%           | -0.87  | -2.21 | 0.02    |
|           |                   |                   | 1980-1984   | 41%           | -1.62  | -3.93 | 0.00    |
|           |                   |                   | 1985-1989   | 23%           | -2.5   | -5.67 | 0.00    |
|           |                   |                   | 1990-1994   | 11%           | -3.41  | -7.37 | 0.00    |
|           |                   |                   | 1995-1999   | 13%           | -3.14  | -7.25 | 0.00    |
|           |                   |                   | 2000-2004   | 4%            | -4.45  | -9.79 | 0.00    |
|           |                   |                   | 2005-2011   | 6%            | -4.06  | -9.84 | 0.00    |



**Table S7. Model-fitted presence and dominance of *A. cervicornis* at reef crest zone, from Pleistocene Epoch to 2011.**

| Reef zone | Species               | Abundance measure | Time bin    | Percent sites | Effect | Z     | p-level |
|-----------|-----------------------|-------------------|-------------|---------------|--------|-------|---------|
| Crest     | <i>A. cervicornis</i> | Presence          | Pleistocene | 73%           | --     | --    | --      |
|           |                       |                   | Holocene    | 45%           | -1.18  | -2.28 | 0.03    |
|           |                       |                   | 1500-1949   | 72%           | -0.03  | -0.04 | 0.97    |
|           |                       |                   | 1950-1959   | 33%           | -1.70  | -2.08 | 0.04    |
|           |                       |                   | 1960-1969   | 13%           | -2.92  | -6.13 | 0.00    |
|           |                       |                   | 1970-1979   | 22%           | -2.28  | -4.74 | 0.00    |
|           |                       |                   | 1980-1984   | 9%            | -3.31  | -6.46 | 0.00    |
|           |                       |                   | 1985-1989   | 19%           | -2.42  | -4.71 | 0.00    |
|           |                       |                   | 1990-1994   | 12%           | -2.96  | -5.80 | 0.00    |
|           |                       |                   | 1995-1999   | 12%           | -2.95  | -5.97 | 0.00    |
|           |                       |                   | 2000-2004   | 6%            | -3.78  | -7.73 | 0.00    |
|           |                       |                   | 2005-2011   | 6%            | -3.74  | -7.86 | 0.00    |
|           |                       |                   | Dominance   | Pleistocene   | 18%    | --    | --      |
|           |                       | Holocene          |             | 12%           | -0.413 | -0.74 | 0.46    |
|           |                       | 1500-1949         |             | 0%            | -16.99 | 0.00  | 1.00    |
|           |                       | 1950-1959         |             | 0%            | -16.97 | -0.01 | 1.00    |
|           |                       | 1960-1969         |             | 7%            | -1.11  | -2.00 | 0.05    |
|           |                       | 1970-1979         |             | 5%            | -1.37  | -2.32 | 0.02    |
|           |                       | 1980-1984         |             | 3%            | -1.83  | -2.97 | 0.00    |
|           |                       | 1985-1989         |             | 2%            | -2.23  | -3.10 | 0.00    |
|           |                       | 1990-1994         |             | 2%            | -2.51  | -3.51 | 0.00    |
|           |                       | 1995-1999         |             | 1%            | -3.16  | -3.84 | 0.00    |
|           |                       | 2000-2004         |             | 1%            | -3.05  | -4.68 | 0.00    |
|           |                       | 2005-2011         |             | 1%            | -3.28  | -5.35 | 0.00    |

**Table S8. Model-fitted presence and dominance of *A. cervicornis* at midslope reef zone, from Pleistocene Epoch to 2011.**

| Reef zone | Species               | Abundance measure | Time bin    | Percent sites | Effect | Z      | p-level |
|-----------|-----------------------|-------------------|-------------|---------------|--------|--------|---------|
| Midslope  | <i>A. cervicornis</i> | Presence          | Pleistocene | 92%           | --     | --     | --      |
|           |                       |                   | Holocene    | 39%           | -2.92  | -4.23  | 0.00    |
|           |                       |                   | 1500-1949   | 83%           | -0.95  | -0.94  | 0.34    |
|           |                       |                   | 1950-1959   | 45%           | -2.71  | -3.39  | 0.00    |
|           |                       |                   | 1960-1969   | 16%           | -4.18  | -6.31  | 0.00    |
|           |                       |                   | 1970-1979   | 30%           | -3.37  | -5.27  | 0.00    |
|           |                       |                   | 1980-1984   | 92-11%        | -4.59  | -6.98  | 0.00    |
|           |                       |                   | 1985-1989   | 92-20%        | -3.87  | -5.92  | 0.00    |
|           |                       |                   | 1990-1994   | 92-12%        | -4.52  | -7.02  | 0.00    |
|           |                       |                   | 1995-1999   | 92-11%        | -4.59  | -7.18  | 0.00    |
|           |                       |                   | 2000-2004   | 92-8%         | -4.88  | -7.66  | 0.00    |
|           |                       |                   | 2005-2011   | 92-6%         | -5.28  | -8.38  | 0.00    |
|           |                       | Dominance         | Pleistocene | 63%           | --     | --     | --      |
|           |                       |                   | Holocene    | 17%           | -2.11  | -3.77  | 0.00    |
|           |                       |                   | 1500-1949   | 43%           | -0.83  | -0.97  | 0.33    |
|           |                       |                   | 1950-1959   | 35%           | -1.19  | -1.64  | 0.10    |
|           |                       |                   | 1960-1969   | 12%           | -2.52  | -4.43  | 0.00    |
|           |                       |                   | 1970-1979   | 9%            | -2.86  | -5.29  | 0.00    |
|           |                       |                   | 1980-1984   | 4%            | -3.75  | -6.41  | 0.00    |
|           |                       |                   | 1985-1989   | 4%            | -3.67  | -6.14  | 0.00    |
|           |                       |                   | 1990-1994   | 1%            | -5.27  | -7.62  | 0.00    |
|           |                       |                   | 1995-1999   | 0%            | -5.96  | -9.12  | 0.00    |
|           |                       |                   | 2000-2004   | 1%            | -5.04  | -8.64  | 0.00    |
|           |                       |                   | 2005-2011   | 0%            | -6.69  | -11.00 | 0.00    |

**Table S9. Model-fitted presence and dominance of *A. palmata* at midslope reef zone, from Pleistocene Epoch to 2011.**

| Reef zone | Species           | Abundance measure | Time bin    | Percent sites | Effect | Z     | p-level |
|-----------|-------------------|-------------------|-------------|---------------|--------|-------|---------|
| Midslope  | <i>A. palmata</i> | Presence          | Pleistocene | 46%           | --     | --    | --      |
|           |                   |                   | Holocene    | 6%            | -0.44  | -0.85 | 0.39    |
|           |                   |                   | 1500-1949   | 0%            | -14.52 | -0.67 | 0.50    |
|           |                   |                   | 1950-1959   | 23%           | -1.09  | -1.48 | 0.13    |
|           |                   |                   | 1960-1969   | 10%           | -2.12  | -4.04 | 0.00    |
|           |                   |                   | 1970-1979   | 20%           | -1.28  | -2.72 | 0.01    |
|           |                   |                   | 1980-1984   | 6%            | -2.58  | -4.82 | 0.00    |
|           |                   |                   | 1985-1989   | 15%           | -1.64  | -3.24 | 0.00    |
|           |                   |                   | 1990-1994   | 6%            | -2.57  | -5.11 | 0.00    |
|           |                   |                   | 1995-1999   | 2%            | -3.89  | -6.63 | 0.00    |
|           |                   |                   | 2000-2004   | 3%            | -3.35  | -6.79 | 0.00    |
|           |                   |                   | 2005-2011   | 2%            | -3.80  | -8.14 | 0.00    |
|           |                   | Dominance         | Pleistocene | 4%            | --     | --    | --      |
|           |                   |                   | Holocene    | 14%           | 1.28   | 1.74  | 0.08    |
|           |                   |                   | 1500-1949   | 0%            | -16.76 | 0.00  | 0.99    |
|           |                   |                   | 1950-1959   | 0%            | -18.33 | 0.00  | 0.99    |
|           |                   |                   | 1960-1969   | 8%            | 0.63   | 0.79  | 0.43    |
|           |                   |                   | 1970-1979   | 6%            | 0.32   | 0.44  | 0.66    |
|           |                   |                   | 1980-1984   | 1%            | -1.10  | -1.25 | 0.21    |
|           |                   |                   | 1985-1989   | 1%            | -1.69  | -1.66 | 0.10    |
|           |                   |                   | 1990-1994   | 0%            | -3.08  | -2.51 | 0.01    |
|           |                   |                   | 1995-1999   | 0%            | -17.60 | -0.01 | 0.99    |
|           |                   |                   | 2000-2004   | 0%            | -3.45  | -3.43 | 0.00    |
|           |                   |                   | 2005-2011   | 0%            | -3.45  | -4.21 | 0.00    |

**Table S10. Generalized linear mixed model results of temporal changes in percent of reef sites with *Acropora* present or dominant, using values from historical period (1500-1949 AD) as baseline.**

Proportion of sites modeled as a function of time bin treated as a fixed effect and country treated as a random effect.

| Reef zone | Species               | Abundance measure | Earliest change relative to Pleistocene | Change | AIC  | Z    | p-level | total sites |
|-----------|-----------------------|-------------------|-----------------------------------------|--------|------|------|---------|-------------|
| Crest     | <i>A. palmata</i>     | presence          | 1960-1969                               | 91-65% | 2237 | -3.0 | 0.01    | 2087        |
|           |                       | dominance         | 1950-1959                               | 78-49% | 1504 | -1.9 | 0.05    | 2068        |
| Midslope  | <i>A. cervicornis</i> | presence          | 1950-1959                               | 83-45% | 3615 | -1.9 | 0.05    | 4491        |
|           |                       | dominance         | 1950-1959                               | 43-35% | 1084 | -4.4 | 0.001   | 5035        |
